# Supplementary material for: Burden of cardiovascular risk factors and disease among patients with type 1 diabetes: results of the Australian National Diabetes Audit (ANDA)
Source: Springer Nature journal article supplement (doi:10.1186/s12933-018-0726-8), 2018-06-02
Supplement: MOESM1 [file 15814336]

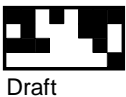

**Section 1. Patient Demographics**

Medical Record No. [ ] [ ] [ ] [ ] [ ] [ ] [ ] [ ] [ ] [ ] Centre ID [ ] [ ] [ ] Site Staff Identifier [ ] [ ] [ ] [ ]

1.1 Date of birth [ ] [ ] / [ ] [ ] / [ ] [ ] [ ] [ ] 1.2 Sex  Male  Female *if FEMALE* → 1.2.1 Currently pregnant  No  Yes

1.3 Date of visit [ ] [ ] / [ ] [ ] / 2 0 1 5 1.4 Initial visit  No  Yes 1.5 Aboriginal/Torres Strait Islander  No  Yes

1.6 Country of birth [ ] [ ] [ ] [ ] [ ] [ ] [ ] [ ] [ ] [ ] 1.7 NDSS member  No  Yes

1.8 DVA patient  No  Yes

**Section 2. Diabetes Type & Management**

2.1 Date of diagnosis [ ] [ ] / [ ] [ ] [ ] [ ] 2.2 Type of diabetes  Type 1  Type 2  GDM  Don't know  Other

2.3 Management method  Diet only  Acarbose  GLP1 Agonist  Sulphonylurea  Insulin *if INSULIN* → 2.3.1 Number of years [ ] [ ]

Glitazone  Metformin  DPP4 Inhibitor  SGLT2  Nil 2.3.2 Mode  Basil  MDI  Pump

**Section 3. Height, Weight & Smoking Status**

3.1 Weight [ ] [ ] [ ] . [ ] Kg

3.2 Height [ ] . [ ] [ ] m

3.3 Smoking status  Current  Past  Never

**Section 5. Diabetic Eye Disease - last 12 months**

|                                 | No                       | Yes                      |
|---------------------------------|--------------------------|--------------------------|
| 5.1 Attended optometrist        | <input type="checkbox"/> | <input type="checkbox"/> |
| 5.2 Referred to ophthalmologist | <input type="checkbox"/> | <input type="checkbox"/> |
| 5.3 Attended ophthalmologist    | <input type="checkbox"/> | <input type="checkbox"/> |
| 5.4 Fundus examination          | <input type="checkbox"/> | <input type="checkbox"/> |
| 5.5 Retinopathy                 | <input type="checkbox"/> | <input type="checkbox"/> |
| 5.6 Laser treatment             | <input type="checkbox"/> | <input type="checkbox"/> |
| 5.7 Right cataract              | <input type="checkbox"/> | <input type="checkbox"/> |
| 5.8 Left cataract               | <input type="checkbox"/> | <input type="checkbox"/> |

**Section 7. Medications & Lipids (most recent results from the last 12 months)**

|                              | No                       | Yes                                                      | Contraindicated          |
|------------------------------|--------------------------|----------------------------------------------------------|--------------------------|
| 7.1 Aspirin                  | <input type="checkbox"/> | <input type="checkbox"/>                                 | <input type="checkbox"/> |
| 7.2 Other anti-platelets     | <input type="checkbox"/> | <input type="checkbox"/>                                 | <input type="checkbox"/> |
| 7.3 Anti-coagulants          | <input type="checkbox"/> | <input type="checkbox"/>                                 | <input type="checkbox"/> |
| 7.4 Lipid lowering Rx        | <input type="checkbox"/> | <input type="checkbox"/>                                 |                          |
| <i>if YES</i> → 7.4.1 Statin | <input type="checkbox"/> | <input type="checkbox"/>                                 | <input type="checkbox"/> |
| 7.4.2 Fibrate                | <input type="checkbox"/> | <input type="checkbox"/>                                 |                          |
| 7.4.3 Ezetrol                | <input type="checkbox"/> | <input type="checkbox"/>                                 |                          |
| 7.4.4 Fish oil               | <input type="checkbox"/> | <input type="checkbox"/>                                 |                          |
| 7.5 Lipids measured          | <input type="checkbox"/> | No <input type="checkbox"/> Yes <input type="checkbox"/> |                          |

*if YES* →  Not available

**OR**

Complete below:

7.5.1 Cholesterol [ ] [ ] . [ ] mmol/L

7.5.2 LDL [ ] . [ ] [ ] mmol/L

7.5.3 HDL [ ] . [ ] [ ] mmol/L

7.5.4 Triglycerides [ ] [ ] . [ ] mmol/L

7.5.5 Were the above fasting lipids?  No  Yes

**Section 4. Blood Pressure**

4.1 Blood pressure (most recent, measured after 5 mins sitting) [ ] [ ] [ ] / [ ] [ ] [ ] mmHg

4.2 Anti-hypertensive treatment  No  Yes  
*if YES* → 4.2.1 Select from below:  
 ACE Inhibitor  A2 Antagonist  Beta Blocker  
 Calcium Antagonist  Thiazides  Other

**Section 6. Diabetic Foot Problems**

|                                              | No                       | Yes                      |
|----------------------------------------------|--------------------------|--------------------------|
| 6.1 Seen by podiatrist in the last 12 months | <input type="checkbox"/> | <input type="checkbox"/> |
| 6.2 Peripheral neuropathy                    | <input type="checkbox"/> | <input type="checkbox"/> |
| 6.3 Past History of ulceration               | <input type="checkbox"/> | <input type="checkbox"/> |
| 6.4 Foot deformity                           | <input type="checkbox"/> | <input type="checkbox"/> |
| 6.5 Peripheral vascular disease              | <input type="checkbox"/> | <input type="checkbox"/> |
| 6.6 Current foot ulcer                       | <input type="checkbox"/> | <input type="checkbox"/> |

**Section 8. Complications/Events/Comorbidities**

|                                                      | Last 12 months           |                                                                                                                                                     | Previous                 |                                                                         |
|------------------------------------------------------|--------------------------|-----------------------------------------------------------------------------------------------------------------------------------------------------|--------------------------|-------------------------------------------------------------------------|
|                                                      | No                       | Yes                                                                                                                                                 | No                       | Yes                                                                     |
| 8.1 Cerebral stroke                                  | <input type="checkbox"/> | <input type="checkbox"/>                                                                                                                            | <input type="checkbox"/> | <input type="checkbox"/>                                                |
| 8.2 Myocardial infarction                            | <input type="checkbox"/> | <input type="checkbox"/>                                                                                                                            | <input type="checkbox"/> | <input type="checkbox"/>                                                |
| 8.3 CABG/Angioplasty                                 | <input type="checkbox"/> | <input type="checkbox"/>                                                                                                                            | <input type="checkbox"/> | <input type="checkbox"/>                                                |
| 8.4 Congestive cardiac failure                       | <input type="checkbox"/> | <input type="checkbox"/>                                                                                                                            | <input type="checkbox"/> | <input type="checkbox"/>                                                |
| 8.5 Lower limb amputation                            | <input type="checkbox"/> | <input type="checkbox"/>                                                                                                                            | <input type="checkbox"/> | <input type="checkbox"/>                                                |
| 8.6 End stage kidney disease                         | <input type="checkbox"/> | <input type="checkbox"/>                                                                                                                            | <input type="checkbox"/> | <input type="checkbox"/>                                                |
| 8.7 Blindness                                        | <input type="checkbox"/> | <input type="checkbox"/>                                                                                                                            | <input type="checkbox"/> | <input type="checkbox"/>                                                |
| 8.8 Severe hypoglycaemia                             | <input type="checkbox"/> | <input type="checkbox"/>                                                                                                                            | NA                       |                                                                         |
| 8.9 Erectile dysfunction                             | <input type="checkbox"/> | <input type="checkbox"/>                                                                                                                            | <input type="checkbox"/> | <input type="checkbox"/>                                                |
| 8.10 Dementia                                        | <input type="checkbox"/> | <input type="checkbox"/>                                                                                                                            | <input type="checkbox"/> | <input type="checkbox"/>                                                |
| 8.11 Malignancy (exclude non-melanotic skin cancers) | <input type="checkbox"/> | Metastatic solid tumour <input type="checkbox"/><br>Non-metastatic solid tumour <input type="checkbox"/><br>Not Applicable <input type="checkbox"/> | <input type="checkbox"/> | Leukaemia <input type="checkbox"/><br>Lymphoma <input type="checkbox"/> |
| 8.12 Liver disease                                   | <input type="checkbox"/> | Mild <input type="checkbox"/> Moderate/Severe <input type="checkbox"/> Not Applicable <input type="checkbox"/>                                      |                          |                                                                         |

**Section 9. Renal Function & Blood Glucose Control**

9.1 Microalbumin/Proteinuria collected  No  Yes

*if YES* → 9.1.1 Result [ ] [ ] [ ] . [ ]

9.1.2 Units  mg/L  μg/min  mg/24 hr  ratio

9.2 Serum creatinine [ ] [ ] [ ] μmol/L

9.3.1 HbA1c Result [ ] [ ] . [ ] % **OR** 9.3.2 [ ] [ ] [ ] mmol/mol

(most recent in last 12 months)
