# Supplementary material for: Burden of cardiovascular risk factors and disease among patients with type 1 diabetes: results of the Australian National Diabetes Audit (ANDA)
Source: Springer Nature journal article supplement (doi:10.1186/s12933-018-0726-8), 2018-06-02
Supplement: MOESM2 [file 15814336]

**ANDA- AQCA 2015 DATA DEFINITIONS**

| <b>Section 1. Patient Demographics</b> |                                                                                                                                                                                                                                                |
|----------------------------------------|------------------------------------------------------------------------------------------------------------------------------------------------------------------------------------------------------------------------------------------------|
| Medical Record No.                     | (Compulsory field). Enter identifier such as record number <b>or</b> the first 2 letters of the first name and surname and month and year of birth (e.g. FFSSMMYY) to enable you to check your records if there is a query regarding the data. |
| Centre ID                              | Site Identifier.                                                                                                                                                                                                                               |
| Site Staff Identifier                  | Site staff ID.                                                                                                                                                                                                                                 |
| Date of birth                          | Record as <b>DD/MM/YYYY</b> . [If unknown other than year : Record as 01/01/YYYY].                                                                                                                                                             |
| Sex                                    | Mark <b>Male or Female</b> indicating phenotypic (physical) sex at birth.                                                                                                                                                                      |
| Currently pregnant                     | If Sex is female, mark <b>Yes or No</b> if the patient is currently pregnant.                                                                                                                                                                  |
| Date of visit                          | Record the date the patient attended as <b>DD/MM/2015</b> .                                                                                                                                                                                    |
| Initial visit                          | Mark <b>No or Yes</b> indicating if this is an initial visit assessment.                                                                                                                                                                       |
| Aboriginal/Torres Straits Islander     | Mark <b>No or Yes</b> indicating Aboriginal / Torres Strait Islander background.                                                                                                                                                               |
| Country of birth                       | Enter the patient's country of birth                                                                                                                                                                                                           |
| NDSS member                            | Record <b>No or Yes</b> if a member of the NDSS.                                                                                                                                                                                               |
| DVA patient                            | Eligible people whose medical care charges are met by the Department of Veterans' Affairs (DVA).                                                                                                                                               |

| <b>Section 2. Diabetes Type &amp; Management</b> |                                                                                                                                                    |
|--------------------------------------------------|----------------------------------------------------------------------------------------------------------------------------------------------------|
| Date of diagnosis                                | Record as <b>MM/YYYY</b> of first diagnostic blood glucose estimation. [If date unknown other than year, record as 01/YYYY].                       |
| Type of diabetes                                 | Mark <b>Type1</b> [IDDM] <b>or Type2</b> [NIDDM] <b>or GDM</b> <b>or Don't know, or Other</b> to indicate the clinical classification of diabetes. |
| Management method                                | If multiple, <b>tick all that apply</b> for management method.                                                                                     |
| Insulin number of years                          | If the patient is on Insulin, record the number of years the patient has been on insulin.                                                          |
| Mode of insulin                                  | If the patient is on Insulin, record mode of administration.                                                                                       |

| <b>Section 3. Height, Weight &amp; Smoking Status</b> |                                                                                                                                                                                                                                  |
|-------------------------------------------------------|----------------------------------------------------------------------------------------------------------------------------------------------------------------------------------------------------------------------------------|
| Weight                                                | Record in <b>kilograms</b> the weight measurement without shoes or jacket.                                                                                                                                                       |
| Height                                                | Record in <b>metres</b> the height measurement without shoes.                                                                                                                                                                    |
| Smoking status                                        | Mark <b>Current or Past or Never</b> to indicate smoking activity of <u>any tobacco material</u> .<br><i>Current = regular smoking over the past 3months, Past = no regular smoking for 1month or more, Never = never smoked</i> |

| <b>Section 4. Blood Pressure</b> |                                                                                                                                       |
|----------------------------------|---------------------------------------------------------------------------------------------------------------------------------------|
| Blood pressure                   | Record Systolic / Diastolic (mm Hg) measured after <b>5 minutes sitting, [1st and 5th phases]</b> .                                   |
| Anti-hypertensive treatment      | Mark <b>No or Yes</b> to indicate if the patient is on treatment for hypertension. If YES, select the medication/s from the list      |
| Anti-hypertensive medications    | Select the anti-hypertensive medication/s that the patient is currently taking. <b>If on combination tablet, tick all that apply.</b> |

| <b>Section 5. Diabetic Eye Disease</b> |                                                                                                                                           |
|----------------------------------------|-------------------------------------------------------------------------------------------------------------------------------------------|
| Attended optometrist                   | Mark <b>No or Yes</b> to indicate if the patient attended an optometrist in the last 12months.                                            |
| Referred to ophthalmologist            | Mark <b>No or Yes</b> to indicate if the patient was referred to an ophthalmologist in the last 12months.                                 |
| Attended ophthalmologist               | Mark <b>No or Yes</b> to indicate if the patient attended an ophthalmologist in the last 12months.                                        |
| Fundus examination                     | Mark <b>No or Yes</b> to indicate if the patient has had an ophthalmological assessment (Direct or Indirect) in the last 12months.        |
| Retinopathy                            | Mark <b>No or Yes</b> to indicate if the ophthalmological assessment revealed any diabetic retinopathy.                                   |
| Laser treatment                        | Mark <b>No or Yes</b> to indicate if the patient has had eye laser treatment.                                                             |
| Right & left cataract                  | Mark <b>No or Yes</b> to indicate if the patient currently has a cataract or has had one removed previously. Record for <b>both</b> eyes. |

| <b>Section 6. Diabetic Foot Problems</b> |                                                                                                                                                        |
|------------------------------------------|--------------------------------------------------------------------------------------------------------------------------------------------------------|
| Attended a podiatrist                    | Mark <b>No or Yes</b> to indicate if the patient saw a podiatrist.                                                                                     |
| Peripheral neuropathy                    | Mark <b>No or Yes</b> to indicate clinical judgement following assessment using pin prick and vibration or monofilament.                               |
| Past history of ulceration               | Mark <b>No or Yes</b> to indicate past history of foot ulceration                                                                                      |
| Foot deformity                           | Mark <b>No or Yes</b> to indicate the presence of <b>any</b> foot deformity (eg. <i>Hallux, hammer or claw toe, flat or high arch, Charcot's</i> )     |
| Peripheral vascular disease              | Mark <b>No or Yes</b> to indicate peripheral vascular disease. YES = absence of both dorsalis pedis <b>and</b> posterior tibial pulses in either foot. |
| Current foot ulcer                       | Mark <b>No or Yes</b> to indicate a current foot ulcer.                                                                                                |

| <b>Section 7. Medications &amp; Lipids</b> |                                                                                                                                                                                                                                                                         |
|--------------------------------------------|-------------------------------------------------------------------------------------------------------------------------------------------------------------------------------------------------------------------------------------------------------------------------|
| Aspirin                                    | Mark <b>No or Yes</b> to indicate whether the patient is on Aspirin. Indicate whether contraindicated.                                                                                                                                                                  |
| Other anti-platelets                       | Mark <b>No or Yes</b> to indicate whether the patient is on any other anti-platelet treatment (e.g. clopidogrel)                                                                                                                                                        |
| Anti-coagulants                            | Mark <b>No or Yes</b> to indicate whether the patient is on anti-coagulant treatment (e.g. Warfarin, novel anti-coagulants)                                                                                                                                             |
| Lipid lowering treatment                   | Mark <b>No or Yes</b> to indicate whether the patient is on lipid lowering treatment. If <b>Yes</b> , indicate whether they are on Statin, Fibrate, Ezetrol and/or Fish Oil. Record if contraindicated to statin. <b>If on combination tablet, tick all that apply.</b> |
| Lipids measured                            | Mark <b>No or Yes</b> to indicate if lipids have been measured in the past 12 months. If <b>Yes</b> , indicate if results are unavailable.                                                                                                                              |
| Cholesterol, LDL, HDL, Triglycerides       | Record <b>absolute result</b> of most recent result of <i>total, LDL &amp; HDL cholesterol and triglycerides</i> in the last 12months.                                                                                                                                  |
| Above measured in fasting specimen         | Mark <b>No or Yes</b> to indicate if the lipids reported at items 7.5.1 to 7.5.4 were measured in a fasting specimen.                                                                                                                                                   |

| <b>Section 8. Complications/Events/Co-morbidities</b>                                                                              |                                                                                                                                                                                                    |
|------------------------------------------------------------------------------------------------------------------------------------|----------------------------------------------------------------------------------------------------------------------------------------------------------------------------------------------------|
| Mark <b>No or Yes</b> to indicate a history of complication or an event in the last 12months <b>AND/OR</b> previously. Answer all. |                                                                                                                                                                                                    |
| Cerebral stroke                                                                                                                    | Due to vascular disease including TIA.                                                                                                                                                             |
| Myocardial infarction                                                                                                              | Evidenced by ECG changes, plasma enzyme changes or medical documentation.                                                                                                                          |
| CABG/Angioplasty                                                                                                                   | CABG, Angioplasty or Stent.                                                                                                                                                                        |
| Congestive cardiac failure                                                                                                         | Symptomatic congestive cardiac failure with response to specific therapy.                                                                                                                          |
| Lower limb amputation                                                                                                              | Amputation of toe, forefoot or leg [above or below knee], not due to trauma or causes other than vascular disease.                                                                                 |
| End stage kidney disease                                                                                                           | Requiring dialysis or having undergone kidney transplantation.                                                                                                                                     |
| Blindness                                                                                                                          | Patient became legally blind (>6/60) in either eye.                                                                                                                                                |
| Severe hypoglycaemia                                                                                                               | Severe hypoglycaemia requiring assistance of another person to actively administer carbohydrates, glucagon, or other corrective actions.                                                           |
| Erectile dysfunction                                                                                                               | History or treatment of failure to achieve or maintain erection sufficient for penetration.                                                                                                        |
| Dementia                                                                                                                           | Chronic cognitive deficit diagnosed by a clinician.                                                                                                                                                |
| Malignancy                                                                                                                         | Indicate type of malignancy <b>or</b> if not applicable. <i>Exclude non-melanotic skin cancers.</i>                                                                                                |
| Liver disease                                                                                                                      | Indicate severity of liver disease <b>or</b> if not applicable.<br><b>Mild = cirrhosis without portal hypertension, chronic hepatitis, Moderate to severe = cirrhosis with portal hypertension</b> |

| <b>Section 9. Renal Function &amp; Blood Glucose Control</b> |                                                                                                                                          |
|--------------------------------------------------------------|------------------------------------------------------------------------------------------------------------------------------------------|
| Microalbumin/Proteinuria collected                           | Mark <b>No or Yes</b> to indicate if microalbumin / proteinuria was done.                                                                |
| Microalbumin/Proteinuria result                              | Record absolute amount of albumin [ <b>mg/L</b> ] <b>or</b> as albumin excretion rate [AER: <b>µg/min or mg/24hr</b> ] <b>or Ratio</b> . |
| Microalbumin/Proteinuria units                               | Mark the applicable units.                                                                                                               |
| Serum creatinine                                             | Record <b>absolute result</b> measurement of serum creatinine in <b>MICROMOLS/L</b> [µmol/L].                                            |
| HbA1c result                                                 | Record <b>absolute result</b> [%] <b>or</b> mmol/mol of the most recent HbA1c result in the last 12months.                               |
